# Supplementary material for: Improving cardiovascular risk stratification: the role of abdominal obesity in predicting MACEs
Source: Springer Nature journal article supplement (doi:10.1186/s12933-025-02885-4), 2025-08-11
Supplement: MOESM2 [file 12933_2025_2885_MOESM2_ESM.pdf]

| Systematic Coronary Risk Evaluation 2 (SCORE2)                                     |                                                                                                                                |                                                                                                                                                                                                                                                                                                                                                                                                                                                                                                                                                                                                                                                                                                                                                                                                                                                                                         |                     | 10-Years CVD (10-year risk)<br>Framingham Risk Score |
|------------------------------------------------------------------------------------|--------------------------------------------------------------------------------------------------------------------------------|-----------------------------------------------------------------------------------------------------------------------------------------------------------------------------------------------------------------------------------------------------------------------------------------------------------------------------------------------------------------------------------------------------------------------------------------------------------------------------------------------------------------------------------------------------------------------------------------------------------------------------------------------------------------------------------------------------------------------------------------------------------------------------------------------------------------------------------------------------------------------------------------|---------------------|------------------------------------------------------|
| Sex, Age, Treated or untreated SBP, Smoking, Diabetes, HDL-c, Total-c, Risk Region |                                                                                                                                |                                                                                                                                                                                                                                                                                                                                                                                                                                                                                                                                                                                                                                                                                                                                                                                                                                                                                         | Variables           | Sex, Age, Smoking, Diabetes, HDL-c, Total-c          |
| Risk Class                                                                         | Apparently Healthy <sup>a</sup>                                                                                                | Patients with comorbidities                                                                                                                                                                                                                                                                                                                                                                                                                                                                                                                                                                                                                                                                                                                                                                                                                                                             |                     |                                                      |
| <b>Low Risk</b>                                                                    | Age <50 years and SCORE2 <2.5%<br>Age 50–69 years and SCORE2 <5.0%<br>Age ≥70 years and SCORE2-OP <7.5%                        | <b>SCORE2 &lt;1%</b>                                                                                                                                                                                                                                                                                                                                                                                                                                                                                                                                                                                                                                                                                                                                                                                                                                                                    | <b>Risk Classes</b> | <b>FRS &lt;10%</b>                                   |
| <b>Moderate Risk</b>                                                               |                                                                                                                                | <b>SCORE 2 ≥1 and &lt;5%</b><br><ul style="list-style-type: none"> <li>▪Diabetes mellitus: <ul style="list-style-type: none"> <li>- Type 1 and age &lt;35 years</li> <li>- Type 2 and age &lt;50 years</li> <li>- Diabetes duration &gt;10 years, without additional risk factors</li> </ul> </li> </ul>                                                                                                                                                                                                                                                                                                                                                                                                                                                                                                                                                                                |                     | <b>FRS ≥ 10 and &lt;20%</b>                          |
| <b>High Risk</b>                                                                   | Age <50 years and SCORE2 ≥2.5 and <7.5%<br>Age 50–69 years and SCORE2 ≥5 and <10%<br>Age ≥70 years and SCORE2-OP ≥7.5 and <15% | <b>SCORE2 ≥5 and &lt;10%</b><br><ul style="list-style-type: none"> <li>▪Markedly elevated single risk factor: <ul style="list-style-type: none"> <li>- Uncontrolled grade 3 hypertension</li> <li>- Severe dyslipidemia</li> <li>- Smoking</li> </ul> </li> <li>▪Diabetes mellitus: <ul style="list-style-type: none"> <li>- Without organ damage (without proteinuria or neuropathy)</li> <li>- Duration ≥10 years</li> <li>- With additional risk factor</li> </ul> </li> <li>▪Moderate CKD (GFR 30–59 mL/min/1.73 m<sup>2</sup>)</li> <li>▪TT echocardiogram: <ul style="list-style-type: none"> <li>- Left ventricular hypertrophy (LVMi &gt;95 g/m<sup>2</sup> [F] or ≥115 g/m<sup>2</sup>)</li> <li>- GLS &gt; -18% or EF &lt;52/54 M/F or altered kinetics</li> </ul> </li> <li>▪Resistant hypertension (not controlled by 3 drugs including a diuretic at full dose)</li> </ul> |                     | <b>FRS ≥ 20%</b>                                     |
| <b>Very High Risk</b>                                                              | Age <50 years and SCORE2 ≥7.5%<br>Age 50–69 years and SCORE2 ≥10.0%<br>Age ≥70 years and SCORE2-OP ≥15.0%                      | <b>SCORE 2 ≥10%</b><br><ul style="list-style-type: none"> <li>▪Past myocardial infarction</li> <li>▪Coronary or other arterial revascularization procedures</li> <li>▪ACS and other arterial atherosclerotic occlusions</li> <li>▪Past stroke or transient ischemic attack</li> <li>▪Aorta aneurism</li> <li>▪Peripheral artery disease</li> <li>▪Diabetes mellitus: <ul style="list-style-type: none"> <li>- With organ damage (proteinuria)</li> <li>- With other major risk factor: <ul style="list-style-type: none"> <li>▪ uncontrolled grade 3 hypertension or severe dyslipidemia or smoking</li> </ul> </li> </ul> </li> <li>▪Severe CKD (GFR&lt;30 mL/min/1.73 m<sup>2</sup>)</li> </ul>                                                                                                                                                                                       |                     |                                                      |
