# Supplementary material for: Improving cardiovascular risk stratification: the role of abdominal obesity in predicting MACEs
Source: Springer Nature journal article supplement (doi:10.1186/s12933-025-02885-4), 2025-08-11
Supplement: MOESM3 [file 12933_2025_2885_MOESM3_ESM.pdf]

**Supplementary Table 2. ANOVA comparison of anthropometric and biochemical makers according to SCORE2/SCORE2-OP risk classes.**

| VARIABLES                 | Low Risk<br>n=85              | Moderate Risk<br>n=269        | High Risk<br>n=196            | Very High Risk<br>n=186       | p-value   |
|---------------------------|-------------------------------|-------------------------------|-------------------------------|-------------------------------|-----------|
| Events (n, %)             | 9 (6.8)                       | 48 (36.4)                     | 36 (27.3)                     | 39 (29.5)                     | <0.001*** |
| Age (years)               | 34.3 ± 10.4 <sup>b,c,d</sup>  | 51.2 ± 8.3 <sup>a,c,d</sup>   | 62.4 ± 6.7 <sup>a,b,d</sup>   | 71.6 ± 7.5 <sup>a,b,c</sup>   | <0.001*** |
| WC (cm)                   | 88.0 ± 12.9 <sup>b,c,d</sup>  | 96.8 ± 15.3 <sup>a,c,d</sup>  | 101.0 ± 13.2 <sup>a,b</sup>   | 103.0 ± 12.3 <sup>a,b</sup>   | <0.001*** |
| BMI (Kg/sqm)              | 23.1 ± 4.8 <sup>b,c,d</sup>   | 27.3 ± 5.8 <sup>a</sup>       | 28.5 ± 5.1 <sup>a</sup>       | 28.4 ± 5.0 <sup>a</sup>       | <0.001*** |
| Glucose (mg/dL)           | 84.2 ± 10.8 <sup>b,c,d</sup>  | 98.5 ± 29.3 <sup>a,c,d</sup>  | 106.6 ± 32.7 <sup>a,b</sup>   | 112.2 ± 33.0 <sup>a,b</sup>   | <0.001*** |
| HbA1c (mmol/mol)          | 34.3 ± 5.5 <sup>b,c,d</sup>   | 39.2 ± 11.2 <sup>a,c,d</sup>  | 43.0 ± 12.3 <sup>a,b</sup>    | 44.1 ± 11.3 <sup>a,b</sup>    | <0.001*** |
| Total Cholesterol (mg/dL) | 179.2 ± 34.7                  | 190.0 ± 38.9 <sup>d</sup>     | 188.1 ± 36.5 <sup>d</sup>     | 176.4 ± 54.4 <sup>b,c</sup>   | 0.003**   |
| HDL (mg/dL)               | 62.9 ± 13.9 <sup>b,c,d</sup>  | 55.5 ± 15.9 <sup>a,d</sup>    | 54.9 ± 16.2 <sup>a,d</sup>    | 49.1 ± 13.8 <sup>a,b,c</sup>  | <0.001*** |
| LDL (mg/dL)               | 99.6 ± 29.3 <sup>b</sup>      | 111.9 ± 35.5 <sup>a,d</sup>   | 109.5 ± 31.8 <sup>d</sup>     | 97.6 ± 35.7 <sup>b,c</sup>    | <0.001*** |
| Triglycerides (mg/dL)     | 83.5 ± 37.2 <sup>b,c,d</sup>  | 114.2 ± 57.4 <sup>a,d</sup>   | 129.1 ± 70.0 <sup>a</sup>     | 144.2 ± 99.7 <sup>a,b</sup>   | <0.001*** |
| SBP (mmHg)                | 112.8 ± 13.2 <sup>b,c,d</sup> | 123.4 ± 14.1 <sup>a,c,d</sup> | 131.6 ± 14.6 <sup>a,b,d</sup> | 138.6 ± 16.6 <sup>a,b,c</sup> | <0.001*** |
| DBP (mmHg)                | 73.2 ± 10.3 <sup>b,c,d</sup>  | 78.3 ± 9.8 <sup>a</sup>       | 80.2 ± 10.5 <sup>a</sup>      | 79.9 ± 10.9 <sup>a</sup>      | <0.001*** |
| Heart Rate (bpm)          | 70.0 ± 10.5 <sup>b,c</sup>    | 72.6 ± 10.5 <sup>a,d</sup>    | 72.8 ± 10.7 <sup>a,d</sup>    | 70.4 ± 9.9 <sup>a,b</sup>     | 0.026*    |
| 25-OH Vitamin D (ng/mL)   | 25.1 ± 11.5 <sup>d</sup>      | 23.6 ± 10.7 <sup>d</sup>      | 23.1 ± 12.2                   | 20.8 ± 10.6 <sup>a,b</sup>    | 0.024*    |
| AST (U/L)                 | 23.0 ± 12.3                   | 24.2 ± 9.5                    | 25.0 ± 12.6                   | 23.3 ± 9.3                    | 0.356     |
| ALT (U/L)                 | 26.9 ± 11.4 <sup>b,c</sup>    | 32.9 ± 14.6 <sup>a,d</sup>    | 32.0 ± 19.2 <sup>a</sup>      | 28.4 ± 14.7 <sup>b</sup>      | 0.002**   |
| GGT (U/L)                 | 22.0 ± 16.2 <sup>b,c,d</sup>  | 36.7 ± 40.9 <sup>a</sup>      | 34.0 ± 25.2 <sup>a</sup>      | 39.4 ± 46.6 <sup>a</sup>      | 0.002**   |
| ALP (U/L)                 | 63.7 ± 23.3 <sup>b</sup>      | 71.9 ± 21.6 <sup>a</sup>      | 70.3 ± 16.8                   | 73.3 ± 23.1 <sup>a</sup>      | 0.014*    |
| Framingham Score          | 1.6 ± 1.4 <sup>b,c,d</sup>    | 8.6 ± 5.8 <sup>a,c,d</sup>    | 20.0 ± 10.1 <sup>a,b,d</sup>  | 39.7 ± 18.1 <sup>a,b,c</sup>  | <0.001*** |
| SCORE 2 / 2-OP            | 0.5 ± 0.3 <sup>b,c,d</sup>    | 2.9 ± 1.2 <sup>a,c,d</sup>    | 7.2 ± 1.4 <sup>a,b,d</sup>    | 16.5 ± 5.8 <sup>a,b,c</sup>   | <0.001*** |

Comparisons were performed with Extended Fisher Chi-Square Test and one-way ANOVA analysis, considering European Society of Cardiology Guidelines SCORE2 < 1 was considered Low Risk; 1 ≤ SCORE2 < 5 was considered Moderate Risk; 5 ≤ SCORE2 < 10 was considered High Risk; SCORE2 ≥ 10 was considered Very High Risk. Data are presented as overall count and percentage or Mean ± SD (standard deviation). <sup>a</sup> Indicates significance with Low Risk; <sup>b</sup> Indicates significance with Moderate Risk <sup>c</sup> Indicates significance with High Risk; <sup>d</sup> Indicates significance with Very High Risk. <sup>a,b,c,d</sup> Were obtained according to Bonferroni Test. (\**p*<0.05; \*\* *p*<0.01; \*\*\* *p*<0.001). Abbreviations: Body Mass Index, BMI; Glycosylated Hemoglobin, HbA1c; High-Density Lipoprotein, HDL; Low-Density Lipoprotein, LDL; Aspartate Transferase, AST; Alanine Transferase, ALT; Gamma-Glutamyl Transpeptidase, GGT; Alkaline phosphatase, ALP.
