# Supplementary figures and images for: Improving cardiovascular risk stratification: the role of abdominal obesity in predicting MACEs
Source: Springer Nature journal article supplement (doi:10.1186/s12933-025-02885-4), 2025-08-11

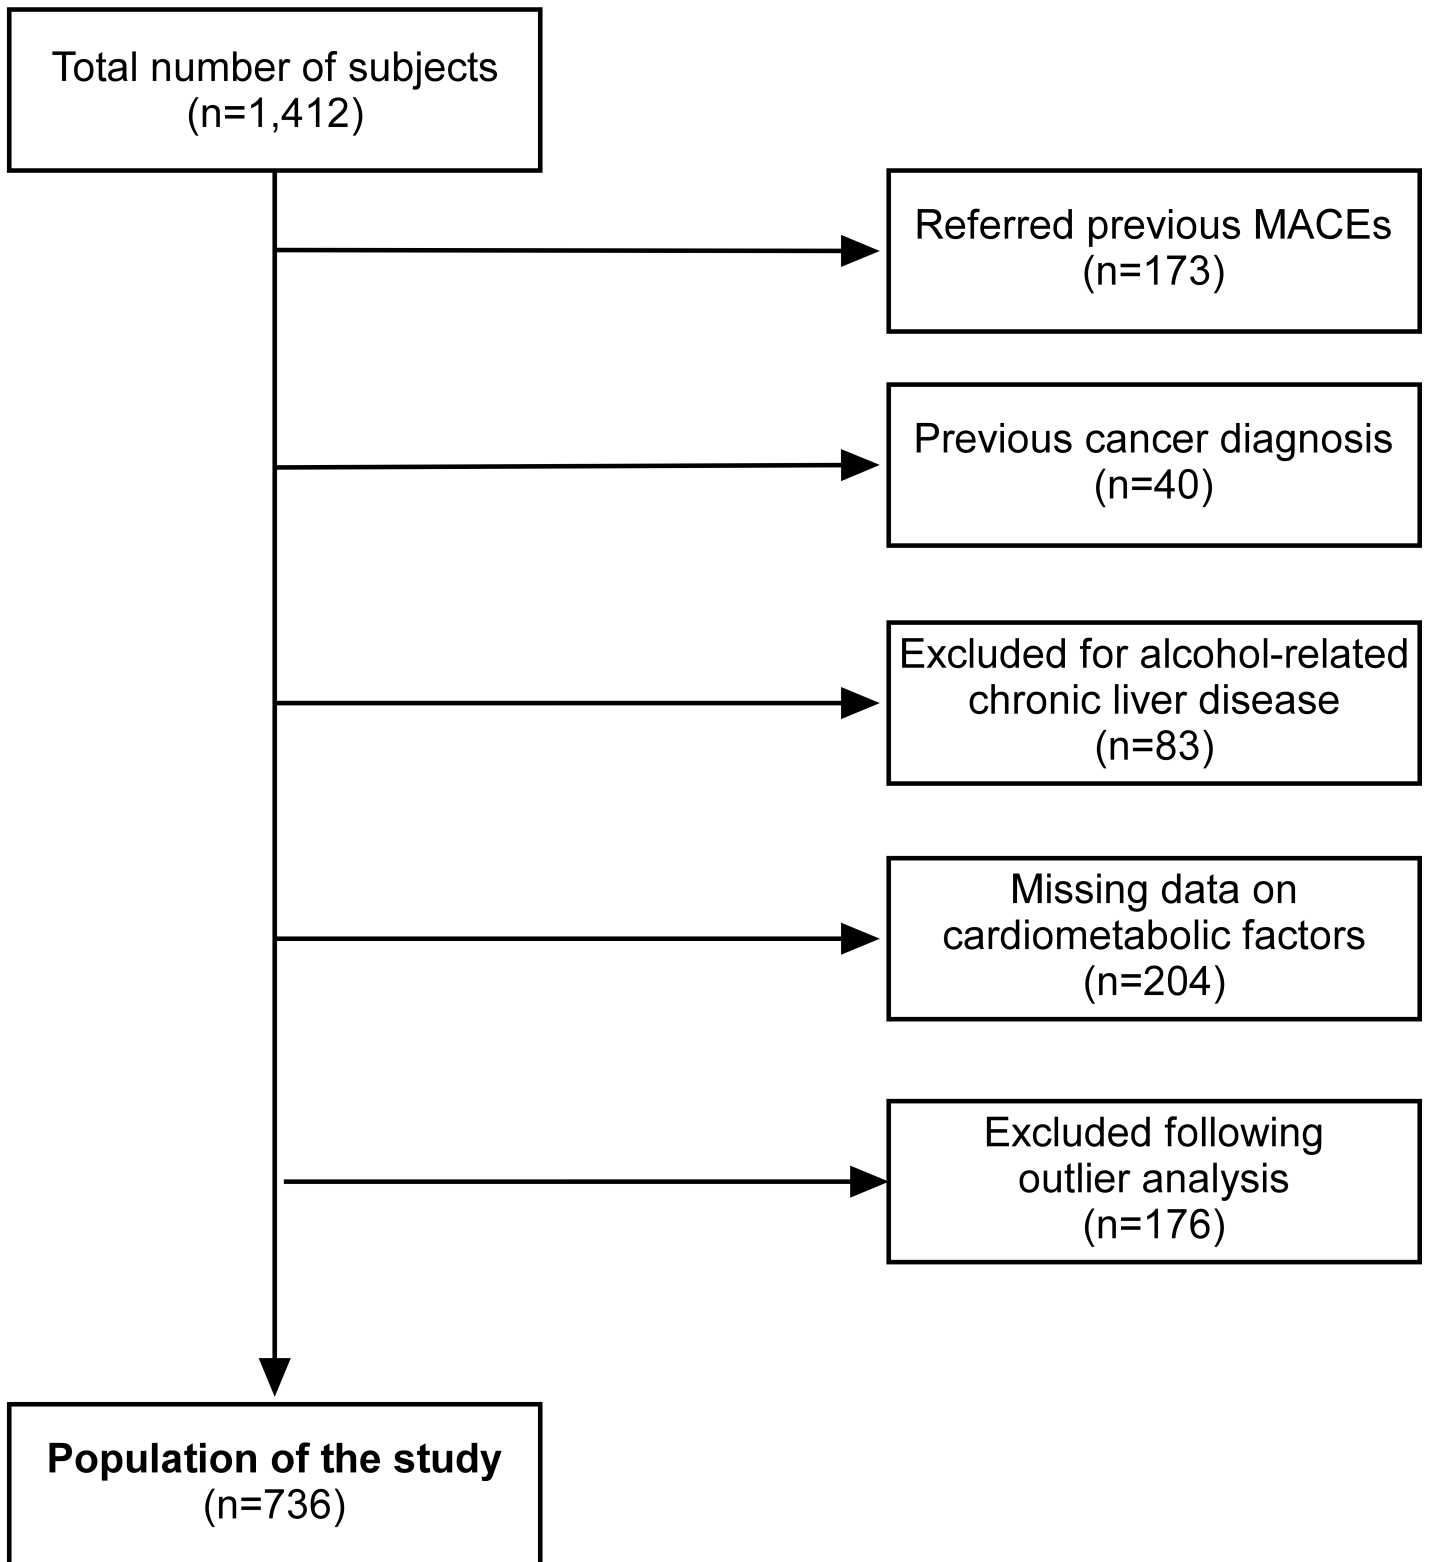

Supplement: MOESM1 [file 12933_2025_2885_MOESM1_ESM.pdf]
